# Supplementary material
Source: Springer Nature journal article supplement (https://www.springermedizin.de/resource/supplementary/13550_2014_199_MOESM4_ESM.pdf/9687802)

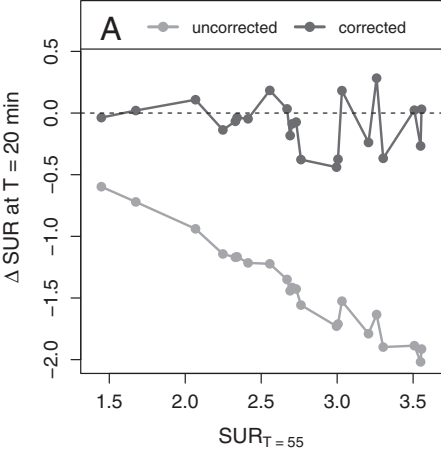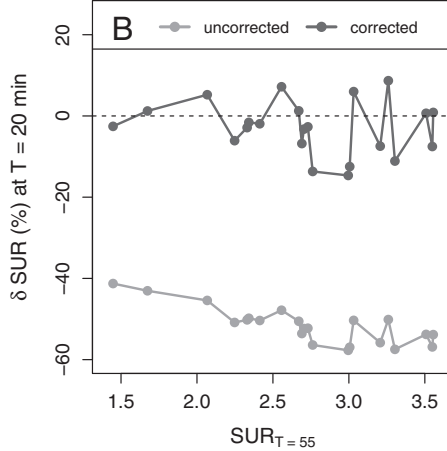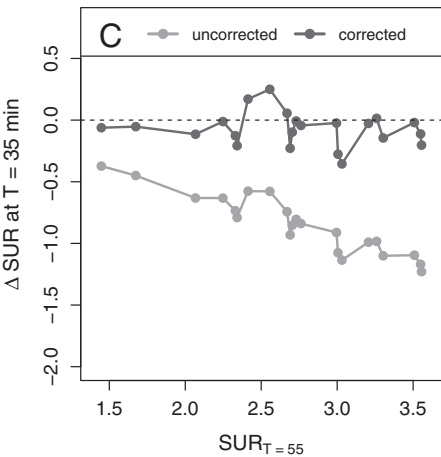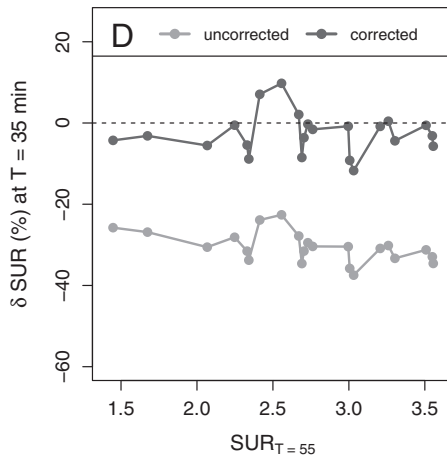

Supplement: MOESM4 [file 9687802]
